# Supplementary material for: Perceived discrimination and coping with substance use among Asian Americans during the COVID-19 pandemic: a cross-sectional analysis
Source: Springer Nature journal article supplement (doi:10.1186/s12889-025-21824-2), 2025-02-20
Supplement: MOESM2 [file 12889_2025_21824_MOESM2_ESM.pdf]

## **AAPI COVID-19 Needs Assessment Survey**

**Q1)** What is your race? *Select all that apply.*

- ☐ Asian
- ☐ Native Hawaiian or Pacific Islander
- ☐ Native American or Alaskan Native
- ☐ African American or Black
- ☐ White, Non-Hispanic/Latino
- ☐ Hispanic/Latino
- ☐ Middle Eastern or North African

**Q2)** How important is/are your race(s) to your identity?

- ☐ Extremely important
- ☐ Very important
- ☐ Somewhat important
- ☐ Not at all important

**Q3)** **Only answer this question if you selected “Asian” in Q1:** What term(s) best express how you describe your ethnic identity *Select all that apply.*

- ☐ Chinese
- ☐ Filipino
- ☐ Indian
- ☐ Vietnamese
- ☐ Korean
- ☐ Japanese
- ☐ Pakistani
- ☐ Cambodian
- ☐ Hmong
- ☐ Thai
- ☐ Laotian
- ☐ Bangladeshi
- ☐ Burmese
- ☐ Indonesian
- ☐ Nepalese
- ☐ Sri Lankan
- ☐ Malaysian
- ☐ Bhutanese
- ☐ Mongolian
- ☐ Okinawan
- ☐ Other, please specify: \_\_\_\_\_

**Q4)** Only answer this question if you selected “Native Hawaiian or Pacific Islander” in Q1: What term(s) best expresses how you describe your ethnic identity? *Select all that apply.*

- ☐ Native Hawaiian
- ☐ Samoan
- ☐ Tongan
- ☐ Fijian
- ☐ Marshallese
- ☐ CHamoru
- ☐ Chuukese
- ☐ Other, please specify: \_\_\_\_\_

**Q5)** How important is your ethnicity to your identity?

- ☐ Extremely important
- ☐ Very important
- ☐ Somewhat important
- ☐ Not at all important

**Q6)** Which of the following do you need more help getting during the COVID-19 pandemic? *Select all that apply.*

- ☐ Food
- ☐ Housing
- ☐ Utilities (electricity, gas, water, sewer, trash collection, phone, cable)
- ☐ Internet/Wi-Fi
- ☐ Unemployment services
- ☐ Health services
- ☐ Mental health services
- ☐ Emergency services (EMS, Fire, Police)
- ☐ Legal assistance
- ☐ Childcare
- ☐ Faith-based or spiritual care
- ☐ Other, please specify: \_\_\_\_\_
- ☐ None of the above

**Q7)** How has the COVID-19 pandemic impacted your family's life? *Select all that apply.*

- ☐ Unable to access healthcare
- ☐ We lost work/jobs
- ☐ We lost income
- ☐ Facing discrimination
- ☐ Impacted my social/religious activities
- ☐ Disrupted education of me or my family members
- ☐ Other, please specify: \_\_\_\_\_
- ☐ None of the above

## Now we are going to ask about your employment.

- Q8)** Have you, or has anyone in your household experienced a loss of employment income **since March 13, 2020**? *Select only one answer.*
- ☐ Yes
  - ☐ No
- Q9)** Do you expect that you or anyone in your household will experience a loss of employment income in the **next 4 weeks** because of the COVID-19 pandemic? *Select only one answer.*
- ☐ Yes
  - ☐ No
- Q10)** In the **last 7 days**, did you do **ANY** work for either pay or profit? *Select only one answer.*
- ☐ Yes
  - ☐ No
- Q11)** *Only answer this question if you selected “Yes” for Q10:* Are you employed by government, by a private company, a nonprofit organization or were you self-employed or working in a family business? *Select only one answer.*
- ☐ Government
  - ☐ Private company
  - ☐ Non-profit organization including tax exempt and charitable organizations
  - ☐ Self-employed
  - ☐ Working in a family business
- Q12)** *Only answer this question if you selected “No” for Q10:* What is your main reason for not working for pay or profit? *Select only one answer.* I did not work because:
- ☐ I did not want to be employed at this time
  - ☐ I am/was sick with COVID-19 symptoms
  - ☐ I am/was caring for someone with COVID-19 symptoms
  - ☐ I am/was caring for children not in school or daycare
  - ☐ I am/was caring for an elderly person
  - ☐ I was concerned about getting or spreading COVID-19
  - ☐ I am/was sick (not COVID-19 related) or disabled
  - ☐ I am retired
  - ☐ My employer experienced a reduction in business (including furlough) due to the COVID-19 pandemic
  - ☐ I am/was laid off due to the COVID-19 pandemic
  - ☐ My employer closed temporarily due to the COVID-19 pandemic
  - ☐ My employer went out of business due to the COVID-19 pandemic
  - ☐ Other; please specify: \_\_\_\_\_
- Q13)** *Only answer this question if you selected “No” for Q10:* Are you receiving pay for the time you are not working? *Select only one answer.*
- ☐ Yes, I use paid leave
  - ☐ Yes, I receive full pay but do not have to take leave
  - ☐ Yes, I receive partial pay
  - ☐ No, I receive no pay

**Q14)** Getting enough food can also be a problem for some people. Which of these statements best describes the food eaten in your household before **March 13, 2020**? *Select only one answer.*

- ☐ Enough of the kinds of food I (we) wanted to eat
- ☐ Enough, but not always the kinds of food I (we) wanted to eat
- ☐ Sometimes not enough to eat
- ☐ Often not enough to eat

**Q15)** In the **last 7 days**, which of these statements best describes the food eaten in your household? *Select only one answer.*

- ☐ Enough of the kinds of food I (we) wanted to eat
- ☐ Enough, but not always the kinds of food I (we) wanted to eat
- ☐ Sometimes not enough to eat
- ☐ Often not enough to eat

**Q16)** *Only answer this question if you **did not** select option 1 in Q15:* Why did you not have enough to eat (or not what you wanted to eat)? *Select all that apply.*

- ☐ Couldn't afford to buy more food
- ☐ Couldn't get out to buy food (for example, didn't have transportation, or had mobility or health problems that prevented you from getting out)
- ☐ Afraid to go or didn't want to go out to buy food
- ☐ Couldn't get groceries or meals delivered to me
- ☐ The stores didn't have the food I wanted
- ☐ None of the above

**Q17)** How confident are you that your household will be able to afford the kinds of food you need for the **next four weeks**? *Select only one answer.*

- ☐ Not at all confident
- ☐ Somewhat confident
- ☐ Moderately confident
- ☐ Very confident

**Q18)** What is your height?

- ☐ In inches: \_\_\_\_\_
- ☐ OR in centimeters: \_\_\_\_\_
- ☐ Don't know
- ☐ Decline to state

**Q19)** What is your weight?

- ☐ In pounds: \_\_\_\_\_
- ☐ OR in kilograms: \_\_\_\_\_
- ☐ Don't know
- ☐ Decline to state

**Q20)** Please write what your age was (in years) on **January 1, 2021**: \_\_\_\_\_

**Q21)** **Before the COVID-19 pandemic** (before March 13, 2020), would you say your health in general was excellent, very good, good, fair, or poor? *Select only one answer.*

- ☐ Excellent
- ☐ Very good
- ☐ Good
- ☐ Fair
- ☐ Poor

**Q22)** **Currently**, would you say your health in general is excellent, very good, good, fair, or poor? *Select only one answer.*

- ☐ Excellent
- ☐ Very good
- ☐ Good
- ☐ Fair
- ☐ Poor

**Q23)** Over the **last 7 days**, how often have you been bothered by **feeling nervous, anxious, or on edge**? *Select only one answer.*

- ☐ Not at all
- ☐ Several days
- ☐ More than half the days
- ☐ Nearly every day

**Q24)** Over the **last 7 days**, how often have you been bothered by **not being able to stop or control worrying**? *Select only one answer.*

- ☐ Not at all
- ☐ Several days
- ☐ More than half the days
- ☐ Nearly every day

**Q25)** Over the **last 7 days**, how often have you been bothered by **having little interest or pleasure in doing things**? *Select only one answer.*

- ☐ Not at all
- ☐ Several days
- ☐ More than half the days
- ☐ Nearly every day

**Q26)** Over the **last 7 days**, how often have you been bothered by **feeling down, depressed, or hopeless**? *Select only one answer.*

- ☐ Not at all
- ☐ Several days
- ☐ More than half the days
- ☐ Nearly every day

**Q27)** Have you ever been told by a doctor or nurse that you have: *Select all that apply?*

- ☐ High blood pressure (hypertension)
- ☐ Diabetes (not including pre-diabetes)
- ☐ Cardiovascular disease (including blocked or hardening of the arteries, angina, or chest pain, heart attack, stroke or mini stroke)
- ☐ Congestive heart failure
- ☐ Lung disease [asthma or COPD (emphysema, chronic bronchitis)]
- ☐ Cancer that you are getting treatment for now
- ☐ Autoimmune disease (like lupus, rheumatoid arthritis, psoriasis)
- ☐ Kidney disease, including weak or failing kidneys (Do NOT include kidney stones or problems with urinating)
- ☐ Low immunity (on any medication that decreases your immunity, such as for a transplant or an immune disease)
- ☐ Anxiety
- ☐ Depression
- ☐ Post-traumatic stress disorder (PTSD)
- ☐ Other mental health conditions
- ☐ None of the above

**Q28)** How have you changed your food habits since the COVID-19 pandemic? *Select all that apply.*

- ☐ Did not change my food habits
- ☐ Started using online grocery and food delivery
- ☐ Ordering food from restaurants or takeout more
- ☐ Ordering food from restaurants or takeout less
- ☐ Meal rationing/skipping meals
- ☐ Using food pantry or food bank
- ☐ Using city or community-based organization food delivery program like Meals on Wheels
- ☐ Getting food from my child/children's school
- ☐ Getting food from neighbors
- ☐ Eating or using expired or spoiling food
- ☐ Cooking more at home
- ☐ Cooking less at home
- ☐ Other; please specify: \_\_\_\_\_

**Q29)** Compared to before COVID-19, are you **exercising (being physically active)** less, more or the same?

- ☐ A lot less
- ☐ Somewhat less
- ☐ The same
- ☐ Somewhat more
- ☐ A lot more

**Q30)** Compared to before COVID-19, are you **sedentary/sitting** more, less or the same amount as you were before?

- ☐ A lot less
- ☐ Somewhat less
- ☐ The same
- ☐ Somewhat more
- ☐ A lot more

**Q31)** What have been your greatest sources of stress from the COVID-19 pandemic? *Select all that apply.*

- ☐ Physical health concerns
- ☐ Mental health concerns
- ☐ Financial concerns
- ☐ Housing concerns
- ☐ Transportation concerns
- ☐ Caregiving responsibilities (for example, caring for children, family members)
- ☐ Impact on work
- ☐ Impact on your child
- ☐ Impact on your community
- ☐ Impact on family members
- ☐ Access to food
- ☐ Access to baby supplies (e.g., formula, diapers, wipes)
- ☐ Access to clean water for hand washing etc.
- ☐ Access to personal care products or household supplies
- ☐ Access to medical care, including mental health care
- ☐ Social distancing or being quarantined
- ☐ Discrimination due to my race/ethnicity
- ☐ I am not stressed about the COVID-19 pandemic
- ☐ None of the above

- Q32)** What have you done to cope with your stress related to the COVID-19 pandemic? *Select all that apply.*
- ☐ Talking with friends and family (e.g., by phone, text, or video)
  - ☐ Talking to my healthcare providers more frequently, including mental healthcare provider (e.g., therapist, psychologist, counselor)
  - ☐ Meditation and/or mindfulness practices
  - ☐ Religious or spiritual practices (e.g., praying, reading religious texts)
  - ☐ Television watching or other "screen time" activities (e.g., video games, social media)
  - ☐ Hobbies and indoor activities (e.g., painting, playing a musical instrument, reading, cooking/baking)
  - ☐ Participated in civic engagement activities (e.g., joined/participated in a community organization, registered to vote, organized/advocated for my community, attended a protest, contacted an elected official)
  - ☐ Exercise (e.g., running, walking, sports, dance)
  - ☐ Eating, including snacking
  - ☐ Sleeping, including napping or lying down in bed
  - ☐ Drinking alcohol
  - ☐ Using tobacco (e.g., smoking, vaping)
  - ☐ Using marijuana (e.g., vaping, smoking, eating) or cannabidiol (CBD)
  - ☐ Other, please specify: \_\_\_\_\_
  - ☐ I have not done any of these things to cope with the COVID-19 pandemic
- Q33)** Since becoming aware of the COVID-19 pandemic, how often have you felt happy and satisfied with your life?
- ☐ Not at all
  - ☐ Rarely
  - ☐ Sometimes
  - ☐ Often
  - ☐ Very Often
- Q34)** Are you currently covered by any of the following types of health insurance or health coverage plans? *Select all that apply.*
- ☐ Insurance through a current or former employer or union (through yourself or another family member)
  - ☐ Insurance purchased directly from an insurance company, including marketplace coverage (through yourself or another family member)
  - ☐ Medicare, for people 65 and older, or people with certain disabilities
  - ☐ Medicaid, Medical Assistance, or any kind of government-assistance plan for those with low incomes or a disability
  - ☐ TRICARE or other military health care
  - ☐ VA (including those who have ever used or enrolled for VA health care)
  - ☐ Indian Health Services
  - ☐ Other
  - ☐ I am not currently covered by any health insurance or health coverage plan
- Q35)** At any time in the **last 4 weeks**, did you DELAY getting medical care because of the COVID-19 pandemic? *Select only one answer.*
- ☐ Yes
  - ☐ No
  - ☐ I did not have any medical needs in the last 4 weeks
- Q36)** At any time in the **last 4 weeks**, did you need medical care for something other than COVID-19, but DID NOT GET IT because of the COVID-19 pandemic? *Select only one answer.*
- ☐ Yes
  - ☐ No
  - ☐ I did not have any medical needs in the last 4 weeks

- Q37)** In what ways has the COVID-19 pandemic affected your overall healthcare? *Select all that apply.*
- ☐ I did not go to healthcare appointments because I was concerned about entering my healthcare provider's office
  - ☐ My healthcare provider canceled appointments
  - ☐ My healthcare provider changed to phone or online visits
  - ☐ My healthcare provider told me to self-isolate or quarantine
  - ☐ None of these apply
- Q38)** How difficult was it to **see a healthcare provider** if you or your family needed to **BEFORE** the COVID-19 pandemic?
- ☐ Not difficult
  - ☐ Somewhat difficult
  - ☐ Very difficult
- Q39)** How difficult has it been to **see a healthcare provider** if you or your family needed to **DURING** the COVID-19 pandemic?
- ☐ Not difficult
  - ☐ Somewhat difficult
  - ☐ Very difficult
- Q40)** How difficult was it to **get routine/essential medications** for you and/or your family **BEFORE** the COVID-19 pandemic?
- ☐ Not difficult
  - ☐ Somewhat difficult
  - ☐ Very difficult
- Q41)** How difficult was it to **get routine/essential medications** for you and/or your family **DURING** the COVID-19 pandemic?
- ☐ Not difficult
  - ☐ Somewhat difficult
  - ☐ Very difficult
- Q42)** How much has the COVID-19 pandemic changed stress and discord in the family?
- ☐ Improved. Family members have become closer with one another.
  - ☐ None. There has been no change in stress and discord in the family.
  - ☐ Mild. Family members occasionally short-tempered with one another; no physical violence.
  - ☐ Moderate. Family members frequently short-tempered with one another; and/or children in the home getting in physical fights with one another.
  - ☐ Severe. Family members frequently short-tempered with one another and adults in the home throwing things at one another, and/or knocking over furniture, and/or hitting and/or harming one another.
- Q43)** What were some of the challenges of remote learning for you and/or your child? *Select all that apply.*
- ☐ Lack of technological equipment
  - ☐ Lack of WI-FI access
  - ☐ Lack of high-speed internet access
  - ☐ Inability to concentrate/study because all family members are present at home
  - ☐ Teachers/professors not accommodating of the student's circumstances
  - ☐ Language barriers in understanding the material
  - ☐ Other, please describe: \_\_\_\_\_
  - ☐ I and/or my child did not experience any challenges with remote learning
  - ☐ This question does not apply to me (I'm not a student, and I don't have a child who is a student)



**Q44)** Prior to the COVID-19 pandemic, how supported did you feel by your social network?

- ☐ Not supported
- ☐ Mostly unsupported
- ☐ Somewhat unsupported
- ☐ Neutral
- ☐ Somewhat supported
- ☐ Mostly supported
- ☐ Very supported

**Q45)** Currently (during the COVID-19 pandemic), how supported do you feel by your social network?

- ☐ Not supported
- ☐ Mostly unsupported
- ☐ Somewhat unsupported
- ☐ Neutral
- ☐ Somewhat supported
- ☐ Mostly supported
- ☐ Very supported

**Q46)** Since the breakout of the COVID-19 pandemic, I have received emotional support from family or friends when needed

- ☐ Strongly agree
- ☐ Agree
- ☐ Neither agree nor disagree
- ☐ Disagree
- ☐ Strongly disagree

**Q47)** Since the breakout of the COVID-19 pandemic, I have received tangible support (e.g., financial, practical) from family or friends when needed

- ☐ Strongly agree
- ☐ Agree
- ☐ Neither agree nor disagree
- ☐ Disagree
- ☐ Strongly disagree

**Q48)** Since the breakout of the COVID-19 pandemic, I am (or have been) there to listen to other's problems when needed

- ☐ Strongly agree
- ☐ Agree
- ☐ Neither agree nor disagree
- ☐ Disagree
- ☐ Strongly disagree

**Q49)** Since the breakout of the COVID-19 pandemic, I have helped others with financial or practical support

- ☐ Strongly agree
- ☐ Agree
- ☐ Neither agree nor disagree
- ☐ Disagree
- ☐ Strongly disagree

**Q50)** Please indicate the extent to which you view the COVID-19 pandemic as having either a positive or negative impact on your life.

- ☐ Extremely negative
- ☐ Moderately negative
- ☐ Somewhat negative
- ☐ No impact
- ☐ Slightly positive
- ☐ Moderately positive
- ☐ Extremely positive

**Q51)** Since the breakout of the COVID-19 pandemic, I have greater appreciation for my family and close friends.

- ☐ Strongly agree
- ☐ Agree
- ☐ Neither agree nor disagree
- ☐ Disagree
- ☐ Strongly disagree

**Q52)** Since the breakout of the COVID-19 pandemic, I have deeper appreciation for life.

- ☐ Strongly agree
- ☐ Agree
- ☐ Neither agree nor disagree
- ☐ Disagree
- ☐ Strongly disagree

**Q53)** Since the breakout of the COVID-19 pandemic, I have been more grateful for each day.

- ☐ Strongly agree
- ☐ Agree
- ☐ Neither agree nor disagree
- ☐ Disagree
- ☐ Strongly disagree

**Q54)** Since the breakout of the COVID-19 pandemic, I have been more accepting of things I cannot change.

- ☐ Strongly agree
- ☐ Agree
- ☐ Neither agree nor disagree
- ☐ Disagree
- ☐ Strongly disagree

**Q55)** Since the breakout of the COVID-19 pandemic, I have found new ways of connecting with family and friends.

- ☐ Strongly agree
- ☐ Agree
- ☐ Neither agree nor disagree
- ☐ Disagree
- ☐ Strongly disagree

**Q56)** Which state do you **CURRENTLY** live in? \_\_\_\_\_

**Please answer the following questions on your beliefs about how COVID-19 is affecting people of your race/ethnicity.**

- Q57)** Has the U.S. become more physically dangerous for people in your racial/ethnic group because of fear of COVID-19?
- ☐ Much more dangerous
  - ☐ Slightly more dangerous
  - ☐ Not more dangerous
  - ☐ Slightly less dangerous
  - ☐ Much less dangerous
- Q58)** Because of COVID-19, how likely are people of your race/ethnicity to lose their jobs?
- ☐ Much more likely
  - ☐ Slightly more likely
  - ☐ Not more likely
  - ☐ Less likely
  - ☐ Much less likely
- Q59)** How often do you worry about people thinking you have COVID-19 simply because of your race/ethnicity?
- ☐ Constantly
  - ☐ Very often
  - ☐ Somewhat often
  - ☐ Rarely
  - ☐ Never
- Q60)** How much do social and mass media reports about COVID-19 change attitudes against people of your racial/ethnic group?
- ☐ Much more positive
  - ☐ Slightly more positive
  - ☐ No change
  - ☐ Slightly more negative
  - ☐ Much more negative
- Q61)** Compared to other groups, what is the risk of getting COVID-19 for people of your race/ethnicity?
- ☐ Much more likely
  - ☐ Slightly more likely
  - ☐ Not more likely
  - ☐ Slightly less likely
  - ☐ Much less likely
- Q62)** Compared to other groups, how is the quality of COVID-19 healthcare for people of your race/ethnicity?
- ☐ Much better
  - ☐ Slightly better
  - ☐ Not better/the same
  - ☐ Slightly worse
  - ☐ Much worse

**Q63)** Due to COVID-19, how often have you been cyberbullied (hate messages/comments directed at you) because of your race/ethnicity?

- ☐ Never
- ☐ One or two times
- ☐ Two or three times a month
- ☐ Once a week
- ☐ Nearly every day

**Q64)** Since COVID-19, have you seen a change in the amount of cyberbullying of people of your race/ethnicity?

- ☐ Greatly increased
- ☐ Slightly increased
- ☐ No change
- ☐ Slightly decreased
- ☐ Greatly decreased

**Q65)** How much does what politicians say about COVID-19 create bias against people of your racial/ethnic group?

- ☐ Strongly increase bias
- ☐ Slightly increase bias
- ☐ No effect
- ☐ Slightly decrease bias
- ☐ Strongly decrease bias

**Q66)** Which of the following election and civic opportunities are you aware of? *Select all that apply.*

- ☐ November 2020 general election
- ☐ 2020 Census
- ☐ None of the above

**Q67)** **Only answer this question if you selected “November 2020 general election” for Q66:** Did you do any of the following? *Select all that apply.*

- ☐ Received information about November 2020 voter registration deadlines or the election.
- ☐ Registered to vote for the November 2020 Election.
- ☐ Voted by mail in the November 2020 Election.
- ☐ Voted early in the November 2020 Election.
- ☐ Voted on Election Day in the November 2020 Election.
- ☐ I did not vote in the November 2020 Election because I am not eligible to vote.
- ☐ I did not vote in the November 2020 Election because I did not receive my ballot.
- ☐ I did not vote in the November 2020 Election because I did not know who or what to vote for.
- ☐ Other reason you did not vote (please specify): \_\_\_\_\_

**Q68)** **Only answer this question if you selected “2020 Census” for Q66:** Did you do any of the following? *Select all that apply.*

- ☐ Received information about the 2020 Census and deadlines
- ☐ Completed the 2020 Census online
- ☐ Completed the 2020 Census over the phone
- ☐ Completed the 2020 Census on paper
- ☐ Completed the 2020 Census by speaking with an enumerator (someone who stopped by your home and interviewed you)

**Q69)** Is your house or apartment...? *Select only one answer.*

- ☐ Owned by you or someone in this household free and clear
- ☐ Owned by you or someone in this household with a mortgage or loan (including home equity loans)
- ☐ Rented
- ☐ Occupied without payment or rent

**Q70)** *Only answer this question if you selected option 3 or 4 in Q69:* Did you pay your last month's rent or mortgage on time? *Select only one answer.*

- ☐ Yes
- ☐ No
- ☐ Payment was deferred

**Q71)** *Only answer this question if you selected option 3 or 4 in Q69:* How confident are you that your household will be able to pay your next rent or mortgage payment on time? *Select only one answer.*

- ☐ No confidence
- ☐ Slight confidence
- ☐ Moderate confidence
- ☐ High confidence
- ☐ Payment is/will be deferred

**Q72)** Do you think you have or had COVID-19?

- ☐ Definitely yes
- ☐ Probably yes
- ☐ Unsure
- ☐ Probably not
- ☐ Definitely not

**Q73)** Have you been tested for COVID-19?

- ☐ No, I never tried to get tested
- ☐ No, I tried to get tested but was not able to
- ☐ Yes, once
- ☐ Yes, 2-3 times
- ☐ Yes, more than 3 times

**Q74)** Did you have any of the following? *Select all that apply.*

- ☐ Symptoms of COVID-19
- ☐ A positive test for COVID-19
- ☐ Close contact with someone who had COVID-19
- ☐ A healthcare provider ever told you that you had COVID-19
- ☐ None of the above

**Q75)** Have you ever had an overnight stay in a hospital for suspected or diagnosed COVID-19?

- ☐ Yes
- ☐ No

**Q76)** Which of the following occurred as a result of your symptoms? *Select all that apply.*

- ☐ I was kept overnight in a hospital because a healthcare provider thought I had COVID-19
- ☐ I saw a healthcare provider in person, such as in a clinic, doctor's office, urgent care, or Emergency Room (ER)/Emergency Department (ED)
- ☐ I spoke to a healthcare provider over the phone, by email, or online
- ☐ I self-isolated or quarantined at home
- ☐ None of the above

**Q77)** How likely are you to get vaccinated for COVID-19 once a vaccination is available to the public?

- ☐ Very unlikely
- ☐ Somewhat unlikely
- ☐ Somewhat likely
- ☐ Very likely
- ☐ Unsure

**The following questions ask about behaviors to stop the spread of COVID-19. For each question, please indicate how often you do these activities.**

**Q78)** How often do you wear a face mask or cover your face with a scarf, bandana, etc. when in public spaces?

- ☐ Not at all
- ☐ Some of the time
- ☐ Much of the time
- ☐ All of the time

**Q79)** How often do you engage in "social distancing" (keeping at least 6 feet away from other people) when in public places?

- ☐ Not at all
- ☐ Some of the time
- ☐ Much of the time
- ☐ All the time

**Q80)** Have you isolated yourself due to known or suspected exposure to COVID-19?

- ☐ Yes, I have isolated myself
- ☐ No, I had wanted to isolate myself but couldn't
- ☐ No, I didn't want to isolate myself when I had known or suspected exposure to COVID-19
- ☐ No, I never had known or suspected exposure to the COVID-19

**Q81)** What year were you born? \_\_\_\_\_

- ☐ I don't know
- ☐ Decline to state

**Q82)** *Only answer this question if you selected "I don't know" for Q81.*

About how old are you? \_\_\_\_\_

**Q83)** What country were you born in? \_\_\_\_\_

**Q84)** *Only answer this question if you did not write "United States" for Q83: About how long have you been in the United States? Round to the nearest year.*

\_\_\_\_\_

**Q85)** What term(s) best expresses how you describe your gender identity? *Select all that apply.*

- ☐ Man
- ☐ Woman
- ☐ Non-binary
- ☐ Transgender
- ☐ Other; please specify: \_\_\_\_\_

**Q86)** What is the highest degree or level of school you have completed, inside or outside the US? *Select only one answer.*

- ☐ Less than 9th grade
- ☐ Some high school
- ☐ High school graduate or equivalent (GED)
- ☐ Technical, trade, or vocational
- ☐ Some college, but degree not received or is in progress
- ☐ Associate degree (AA, AS)
- ☐ Bachelor's degree (BA, BS, AB)
- ☐ Graduate degree (Master's, Professional, Doctorate)

**Q87)** What is your marital status? *Select only one answer.*

- ☐ Married or with a partner
- ☐ Widowed
- ☐ Divorced
- ☐ Separated
- ☐ Single

**Q88)** How many total people (adults and children) **currently** live in your household, including yourself? *Please enter a number.* \_\_\_\_\_

**Q89)** How many people under 18 years-old **currently** live in your household? *Please enter a number.*

\_\_\_\_\_

**Q90)** How many people aged 65 or older **currently** live in your household? *Please enter a number.*

\_\_\_\_\_

**Q91)** Are **you** an ESSENTIAL WORKER (e.g., healthcare, delivery worker, store worker, security, building maintenance)?

- ☐ Yes
- ☐ No
- ☐ Unsure

**Q92)** **Only answer this question if you selected “Yes” for Q91:** Are **you** a first responder, healthcare provider, or other worker in a facility treating COVID-19?

- ☐ Yes
- ☐ No

**Q93)** Are **any other adults living in the home** an ESSENTIAL WORKER (e.g., healthcare, delivery worker, store worker, security, building maintenance)?

- ☐ Yes
- ☐ No
- ☐ There is no other adult living in my home besides me

**Q94)** Only answer this question if you selected “Yes” for Q93: Are **they** a first responder, healthcare provider or other worker in a facility treating COVID-19?

- ☐ Yes
- ☐ No

**Q95)** In 2019 what was your total household income before taxes? *Select only one answer.*

- |                                           |                                             |
|-------------------------------------------|---------------------------------------------|
| <input type="radio"/> Less than \$5,000   | <input type="radio"/> \$50,000 - \$74,999   |
| <input type="radio"/> \$5,000 - \$11,999  | <input type="radio"/> \$75,000 - \$99,999   |
| <input type="radio"/> \$12,000 - \$24,999 | <input type="radio"/> \$100,000 - \$149,999 |
| <input type="radio"/> 25,000 - \$34,999   | <input type="radio"/> \$150,000 - \$199,999 |
| <input type="radio"/> \$35,000 - \$49,999 | <input type="radio"/> \$200,000 and above   |

**Q96)** Which one applies to you? *Your information will only be used for statistical analyses conducted by the research team and will not be used for any other purpose or shared with any other parties.*

- ☐ US citizen
- ☐ Temporary resident/green card
- ☐ Permanent resident/green card
- ☐ Visa holder, (enter type of visa): \_\_\_\_\_
- ☐ Temporary Protected Status (TPS)
- ☐ Deferred Action for Childhood Arrivals (DACA)
- ☐ Refugee
- ☐ Undetermined
- ☐ Prefer not to answer
- ☐ Other, please describe: \_\_\_\_\_

**Q97)** What are the main ways you get information about the pandemic? *Select all that apply.*

- ☐ Government health websites (like the CDC or Department of Health)
- ☐ Searching for information online (like Google)
- ☐ Social media (like Facebook, Instagram, and Twitter)
- ☐ Television news or radio
- ☐ Newspaper, magazines
- ☐ Family/friends
- ☐ Health care providers, like doctors
- ☐ Community or faith leaders
- ☐ Other, please specify: \_\_\_\_\_
- ☐ None of the above

**Q98)** How often do you get information about the pandemic?

- |                                              |                                                |
|----------------------------------------------|------------------------------------------------|
| <input type="radio"/> Less than once a month | <input type="radio"/> Several times a week     |
| <input type="radio"/> Once a month           | <input type="radio"/> Once a day               |
| <input type="radio"/> Several times a month  | <input type="radio"/> 2-10 times a day         |
| <input type="radio"/> Once a week            | <input type="radio"/> More than 10 times a day |

**Q99)** How informed would you say you are about the current pandemic?

- ☐ Not very informed
- ☐ Somewhat informed
- ☐ Very informed



**Q100)** Does information about COVID-19 ever make you feel anxious/overwhelmed?

- ☐ Yes - Often
- ☐ Yes - Sometimes
- ☐ No

**Q101)** We are interested in understanding geographic differences in experiences with COVID-19 pandemic. To help us analyze survey responses across the entire United States, please provide your **CURRENT 5-digit ZIP code (i.e., where you CURRENTLY live)** below. Your address information will only be used for statistical analyses conducted by the research team and will not be used for any other purpose or shared with any other parties.

---

**Q102)** How did you learn about this survey?

- ☐ Referred by someone who also took the survey
- ☐ Referred by an organization; Please specify the organization:

☐ Other; please specify: \_\_\_\_\_
